# Supplementary material
Source: PubMed Central journal article supplement (PMC7973334)
Supplement: 12250_2020_247_MOESM1_ESM.pdf [file 12250_2020_247_MOESM1_ESM.pdf]

## Electronic Supplementary Material

### Identification and Molecular Characterization of a New Omono River Virus Isolated from *Culex tritaeniorhynchus* in Yunnan, China

Yawei Zhang<sup>1</sup> • Xin Qiang<sup>1</sup> • Xiaofang Guo<sup>2</sup> • Honghong Peng<sup>1</sup> • Si Qin<sup>1</sup> • Yujun Cui<sup>1</sup> • Hang Fan<sup>1</sup>✉ •  
Hongning Zhou<sup>2</sup>✉ • Jiusong Zhang<sup>1</sup>✉ • Jinglin Wang<sup>1</sup>✉ • Yigang Tong<sup>3</sup>✉

1. State Key Laboratory of Pathogen and Biosecurity, Beijing Institute of Microbiology and Epidemiology, Beijing 100071, China
2. Yunnan Provincial Key Laboratory of Vector-borne Diseases Control and Research, Yunnan Institute of Parasitic Diseases, Pu'er 665000, China
3. Beijing Advanced Innovation Center for Soft Matter Science and Engineering (BAIC-SM), College of Life Science and Technology, Beijing University of Chemical Technology, Beijing 100029, China

Supporting information to DOI: 10.1007/s12250-020-00247-w

**Table S1.** List of protein sequences used for reconstruction of *Totiviridae* RdRp-based phylogenetic tree.

| Accession      | Virus Name                                                    | Abbreviation | Host       |
|----------------|---------------------------------------------------------------|--------------|------------|
| BAU71114.1     | <i>Alternaria arborescens</i> victorivirus 1                  | AaVV1        | Fungi      |
| AOR51364.1     | <i>Anopheles</i> totivirus                                    | AToV         | Arthropod  |
| YP_003934934.1 | <i>Armigeres subalbatus</i> virus                             | AsV          | Arthropod  |
| CCD33024.1     | <i>Aspergillus foetidus</i> slow virus 1                      | AfV S1       | Fungi      |
| YP_009417301.1 | Australian <i>Anopheles</i> totivirus                         | AATV         | Arthropod  |
| YP_009032633.1 | <i>Beauveria bassiana</i> victorivirus 1                      | BbVV NZ-1980 | Fungi      |
| APS85760.1     | <i>Biomphalaria</i> virus                                     | BV5          | Mollusk    |
| YP_009072433.1 | <i>Botryosphaeria dothidea</i> victorivirus 1                 | BdV1         | Fungi      |
| YP_009230208.1 | <i>Camponotus nipponicus</i> virus                            | CNV          | Arthropod  |
| YP_009143313.1 | <i>Camponotus yamaokai</i> virus                              | CYV          | Arthropod  |
| YP_024728.1    | <i>Chalara elegans</i> RNA virus 1                            | ChalEIV      | Fungi      |
| CAJ57274.1     | Cherry chlorotic rusty spot associated totiviral-like dsRNA 4 | CCRS4        | Fungi      |
| YP_392467.1    | <i>Coniothyrium minitans</i> RNA virus                        | CmRV         | Fungi      |
| AMB17466.1     | <i>Delisea pulchra</i> totivirus IndA                         | DpR          | Plant      |
| YP_003289293.1 | <i>Drosophila melanogaster</i> totivirus                      | DTV          | Arthropod  |
| AOM63180.1     | <i>Eimeria stiedai</i> RNA virus 1                            | EsRV1        | Protozoan  |
| YP_009115500.1 | <i>Eimeria tenella</i> RNA virus 1                            | EtRV1        | Protozoan  |
| CAK02788.1     | <i>Epichloe festucae</i> virus 1                              | EfV1         | Fungi      |
| YP_009272905.1 | <i>Fusarium poae</i> victorivirus 1                           | FpV1         | Fungi      |
| NP_620070.1    | <i>Giardia lamblia</i> virus                                  | GLV          | Protozoan  |
| YP_009256209.1 | Golden shiner totivirus                                       | GSTV         | Vertebrate |
| NP_624332.2    | <i>Gremmeniella abietina</i> RNA virus L1                     | GaRV L1      | Fungi      |
| NP_898833.1    | <i>Helicobasidium mompa</i> totivirus                         | HmV1-17      | Fungi      |
| AAB94791.2     | <i>Helminthosporium victoriae</i> virus                       | HvV 190S     | Fungi      |
| YP_009030005.1 | <i>Leishmania aethiopica</i> RNA virus                        | LRV Lae      | Protozoan  |
| APT68189.1     | <i>Leishmania</i> RNA virus 1                                 | LRV 1-1      | Protozoan  |
| AHK06416.1     | <i>Leishmania</i> RNA virus 2                                 | LRV 2-1      | Protozoan  |
| YP_009072448.1 | <i>Leptopilina boulardi</i> toti-like virus                   | LbTV         | Arthropod  |
| ALD89107.1     | <i>Macrophomina phaseolina</i> totivirus 1                    | MpTotV1      | Fungi      |
| YP_122352.1    | <i>Magnaporthe oryzae</i> virus 1                             | MoV1         | Fungi      |
| YP_009259486.1 | Maize-associated totivirus                                    | MATV         | Plant      |
| YP_009254736.1 | <i>Nigrospora oryzae</i> victorivirus 1                       | NoRV1        | Fungi      |
| BAJ21511.1     | Omono river virus                                             | ORV AK4      | Arthropod  |
| CAJ34336.1     | <i>Ophiostoma minus</i> totivirus                             | OmV          | Fungi      |
| YP_009225665.1 | <i>Panax notoginseng</i> virus A                              | PnVA         | Plant      |
| YP_529549.2    | Penaeid shrimp infectious myonecrosis virus                   | IMNV         | Arthropod  |
| YP_009212848.1 | <i>Penicillium aurantiogriseum</i> totivirus 1                | PaTV1        | Fungi      |
| YP_009249475.1 | <i>Penicillium digitatum</i> virus 1                          | PdV1         | Fungi      |
| ALD89108.1     | <i>Phomopsis longicolla</i> totivirus 1                       | PLTV         | Fungi      |
| YP_009115492.1 | <i>Phomopsis vexans</i> RNA virus                             | PvRV         | Fungi      |
| YP_004581250.1 | Piscine myocarditis virus                                     | PMCV         | Vertebrate |
| YP_009229915.1 | Piscine myocarditis-like virus                                | PMCLV        | Vertebrate |

|                |                                                                  |           |                    |
|----------------|------------------------------------------------------------------|-----------|--------------------|
| AOX47551.1     | <i>Pterostylis sanguinea</i> totivirus A                         | PstV-A    | Plant              |
| ATO91007.1     | <i>Puccinia striiformis</i> totivirus 1                          | PstV1     | Fungi              |
| YP_009182174.1 | Red clover powdery mildew-associated totivirus 1                 | RPaTV1    | Fungi              |
| YP_008130308.1 | <i>Rosellinia necatrix</i> victorivirus 1                        | RnVV1     | Fungi              |
| NP_620495.1    | <i>Saccharomyces cerevisiae</i> virus LA                         | ScV L A   | Fungi              |
| AAB02146.1     | <i>Saccharomyces cerevisiae</i> virus LBC La                     | ScV L BC  | Fungi              |
| AGG68771.1     | <i>Scheffersomyces segobiensis</i> virus L                       | SsVL      | Fungi              |
| YP_009259368.1 | <i>Sclerotinia nivalis</i> victorivirus 1                        | SnVV      | Fungi              |
| NP_047558.1    | <i>Sphaeropsis sapinea</i> RNA virus 1                           | SsRV1     | Fungi              |
| YP_005454251.1 | Tianjin totivirus                                                | ToV       | Vertebrate         |
| YP_004089630.1 | <i>Tolypocladium cylindrosporum</i> virus 1                      | TcV1      | Fungi              |
| YP_009162330.1 | <i>Trichomonas vaginalis</i> virus 1                             | TVV1      | Protozoan          |
| AKE98370.1     | <i>Trichomonas vaginalis</i> virus 2                             | TVV2      | Protozoan          |
| AKE98372.1     | <i>Trichomonas vaginalis</i> virus 3                             | TVV3      | Protozoan          |
| AED99796.1     | <i>Trichomonas vaginalis</i> virus 4                             | TVV4      | Protozoan          |
| ADQ54106.1     | <i>Tuber aestivum</i> virus 1                                    | TaV1      | Fungi              |
| YP_007761589.1 | <i>Ustilagoidea vires</i> RNA virus 1                            | UvRV1     | Fungi              |
| YP_007697651.1 | <i>Xanthophyllomyces dendrorhous</i> L1A                         | XdV L1A   | Fungi              |
| BAJ21513.1     | Omono River virus Y61                                            | ORV Y61   | Arthropod          |
| AUI11418.1     | Omono River virus TB102                                          | ORV TB102 | Arthropod          |
| AUI11419.1     | Omono River virus TB94                                           | ORV TB94  | Arthropod          |
| AUX13136       | Lonestar tick totivirus                                          | LTV       | Arthropod          |
| BBD50443       | <i>Pythium polare</i> RNA virus 1                                | PpV1      | Fungi              |
| AXQ04872       | Totivirus-like <i>Culex</i> mosquito virus 1                     | TCmV1     | Arthropod          |
| AYD49682       | <i>Fusarium asiaticum</i> victorivirus 1                         | FAVV1     | Fungi              |
| AYD61657       | <i>Blechnomonas juanalfonzi</i> Leishmanivirus-like RNA virus 1  | LRV BJ1   | Protozoan          |
| AYD61662       | <i>Blechnomonas maslovi</i> Leishmanivirus-like RNA virus 1      | LRV BM1   | Protozoan          |
| AYD61665       | <i>Blechnomonas wendygibsoni</i> Leishmanivirus-like RNA virus 1 | LRV BW1   | Protozoan          |
| AZT88633       | <i>Colletotrichum eremochloae</i> totivirus 1                    | CEV1      | Fungi              |
| AZT88645       | <i>Tolypocladium ophioglossoides</i> totivirus 1                 | ToTV1     | Fungi              |
| AZT88647       | <i>Hortaea werneckii</i> totivirus 1                             | HwTV1     | Fungi              |
| QBA69889       | <i>Botrytis cinerea</i> victorivirus 1                           | BcV1      | Fungi              |
| YP_009551559   | Diatom colony associated dsRNA virus 8                           | DCV8      | Chromalve<br>olata |
| YP_009552789   | Diatom colony associated dsRNA virus 5                           | DCV5      | Chromalve<br>olata |
| YP_009552795   | Diatom colony associated dsRNA virus 11                          | DCV11     | Chromalve<br>olata |
| YP_009552822   | <i>Culex tritaeniorhynchus</i> totivirus                         | CTV       | Arthropod          |
| QBL75907       | <i>Solenopsis midden</i> virus                                   | SMV       | Arthropod          |
| QBP37034       | <i>Lampyrus noctiluca</i> toti-like virus 1                      | LNTV1     | Arthropod          |
| NP108651       | <i>Eimeria brunetti</i> RNA virus                                | EbRV1     | Protozoan          |
| YP052858       | <i>Helminthosporium victoriae</i> 145S virus                     | HvV 145S  | Fungi              |
